# Supplementary material for: Social and psychological impact of the COVID-19 pandemic on UK medical and nursing students: protocol for a national medical and nursing student survey
Source: PubMed Central journal article supplement (PMC9082730; doi:10.1136/bmjopen-2021-057467), 2022-05-06
Supplement: bmjopen-2021-057467supp001.pdf [file bmjopen-2021-057467supp001.pdf]

## UK N.M.C Approved Adult Nursing Programmes

| Approved education institution | Course                                                            |
|--------------------------------|-------------------------------------------------------------------|
| University Of Essex            | Adult Nursing                                                     |
| University Of Essex            | Adult Nursing (nursing degree apprenticeship route)               |
| Edinburgh Napier University    | Bachelor of Nursing (Adult)                                       |
| University Of Wolverhampton    | Bachelor of Nursing (BNurs (Hons)) Adult Nursing                  |
| University Of Wolverhampton    | Bachelor of Nursing (BNurs (Hons)) Adult Nursing [Apprenticeship] |
| University Of Glasgow          | Bachelor of Nursing (Honours)                                     |
| University Of Manchester       | Bachelor of Nursing (Hons) (Adult)                                |
| University Of Birmingham       | Bachelor of Nursing (Hons) (Adult)                                |
| University Of Liverpool        | Bachelor of Nursing (Hons) Nursing (Adult)                        |
| University Of Glasgow          | Bachelor of Nursing (ordinary) [fall back award]                  |
| Cardiff University             | Bachelor of Nursing Adult                                         |
| University of Derby            | Bachelor of Science (Honours) in Nursing (Adult)                  |
| University of Derby            | Bachelor of Science (Honours) in Nursing (adult) (apprenticeship) |
| University Of Sheffield        | BMed Sci (Hons) Nursing (Adult)                                   |
| University Of Sheffield        | BMedSci (Hons) Nursing (Adult) Apprenticeship route               |
| University of Chester          | BN (Hons) Adult Nursing                                           |
| University of Chester          | BN (Hons) Adult Nursing                                           |
| University of Chester          | BN (Hons) Adult Nursing                                           |
| University of Chester          | BN (Hons) Adult Nursing                                           |
| University of Chester          | BN (Hons) Adult Nursing                                           |

| Approved education institution                             | Course                                           |
|------------------------------------------------------------|--------------------------------------------------|
| University of Chester                                      | BN (Hons) Adult Nursing Apprenticeship           |
| University of Chester                                      | BN (Hons) Adult Nursing Apprenticeship           |
| University Of Portsmouth                                   | BN (Hons) Nursing (Adult)                        |
| University of Winchester                                   | BN (Hons) Nursing (Adult)                        |
| Glyndwr University (formerly North East Wales Inst. of HE) | BN Nursing                                       |
| University Of Edinburgh                                    | BN nursing (adult)                               |
| University Of Edinburgh                                    | BN nursing with Honours (adult)                  |
| University of Chester                                      | BNurs (Hons) Adult                               |
| University of Chester                                      | BNurs (Hons) Adult (part-time)                   |
| University of Chester                                      | BNurs (Hons) Adult Apprenticeship                |
| University Of Wolverhampton                                | BNurs (Hons) Adult Nursing                       |
| University Of Wolverhampton                                | BNurs (Hons) Adult Nursing Apprenticeship        |
| University of West London                                  | BNursing (Hons) Adult                            |
| University Of Hertfordshire                                | BSc Hons Nursing (Adult)                         |
| University Of Stirling                                     | BSc (Honours) Nursing (Adult)                    |
| Coventry University                                        | BSc (Hons) Adult Nursing                         |
| Coventry University                                        | BSc (Hons) Adult Nursing (Degree apprenticeship) |
| Oxford Brookes University                                  | BSc (Hons) (Adult)                               |
| London South Bank University                               | BSc (Hons) adult nursing                         |
| University of Suffolk                                      | BSc (Hons) Adult Nursing                         |
| University of West of Scotland                             | BSc (Hons) Adult Nursing                         |
| Leeds Beckett University                                   | BSc (Hons) Adult Nursing                         |
| University of Northampton                                  | BSc (Hons) Adult Nursing                         |
| Bournemouth University                                     | BSc (Hons) Adult Nursing                         |

| Approved education institution     | Course                                                                       |
|------------------------------------|------------------------------------------------------------------------------|
| University of Roehampton           | BSc (Hons) Adult Nursing                                                     |
| University Of Dundee               | BSc (Hons) Adult Nursing                                                     |
| University of West of Scotland     | BSc (Hons) Adult Nursing                                                     |
| University Of Greenwich            | BSc (Hons) Adult Nursing                                                     |
| University of Bedfordshire         | BSc (Hons) Adult Nursing                                                     |
| Bournemouth University             | BSc (Hons) Adult Nursing (Apprenticeship)                                    |
| University of Bedfordshire         | BSc (Hons) Adult Nursing (apprenticeship)                                    |
| University of Sunderland           | BSc (Hons) Adult Nursing (blended)                                           |
| University of Sunderland           | BSc (Hons) Adult Nursing (blended)                                           |
| Leeds Beckett University           | BSc (Hons) Adult Nursing (degree apprenticeship)                             |
| Manchester Metropolitan University | BSc (Hons) Adult Nursing (Pre-registration)                                  |
| University of Suffolk              | BSc (Hons) Adult Nursing [degree apprenticeship]                             |
| Coventry University                | BSc (Hons) Adult Nursing Blended Learning                                    |
| Coventry University                | BSc (Hons) Adult Nursing Blended Learning Nursing Degree Apprenticeship      |
| University Of Greenwich            | BSc (Hons) Adult Nursing Degree Apprenticeship                               |
| Solent University                  | BSc (Hons) Adult Nursing Practice – apprenticeship                           |
| University of Sunderland           | BSc (Hons) adult nursing practice                                            |
| Solent University                  | BSc (Hons) Adult Nursing Practice                                            |
| University Of Huddersfield         | BSc (Hons) Degree Apprenticeship - Registered Nurse Child (Blended Learning) |
| University Of Huddersfield         | BSc (Hons) Degree Apprenticeship-Registered Nurse: Adult                     |

| Approved education institution                    | Course                                                          |
|---------------------------------------------------|-----------------------------------------------------------------|
| <b>BPP</b>                                        | BSc (Hons) Nursing (Adult) [Nursing Degree Apprenticeship]      |
| <b>BPP</b>                                        | BSc (Hons) Nursing (Adult) [pre registration nursing]           |
| <b>University of East Anglia</b>                  | BSc (Hons) nursing - Adult                                      |
| <b>University Of Huddersfield</b>                 | BSc (Hons) Nursing - Adult                                      |
| <b>University Of The West Of England, Bristol</b> | BSc (Hons) Nursing - Adult                                      |
| <b>University of East Anglia</b>                  | BSc (Hons) Nursing - Adult Degree Apprenticeship                |
| <b>Queen Margaret University</b>                  | BSc (Hons) Nursing                                              |
| <b>University Of Plymouth</b>                     | BSc (Hons) Nursing (Adult Health)                               |
| <b>University Of Plymouth</b>                     | BSc (Hons) Nursing (Adult Health) - Nurse Degree Apprenticeship |
| <b>University Of York</b>                         | BSc (hons) Nursing (Adult)                                      |
| <b>University of Salford</b>                      | BSc (Hons) Nursing (adult)                                      |
| <b>University of Bolton</b>                       | BSc (Hons) Nursing (adult)                                      |
| <b>University of Nottingham</b>                   | BSc (Hons) Nursing (adult)                                      |
| <b>Buckinghamshire New University</b>             | BSc (Hons) Nursing (Adult)                                      |
| <b>Anglia Ruskin University</b>                   | BSc (Hons) Nursing (Adult)                                      |
| <b>Swansea University</b>                         | BSc (Hons) Nursing (Adult)                                      |
| <b>Edge Hill University</b>                       | BSc (Hons) Nursing (Adult)                                      |
| <b>Edge Hill University</b>                       | BSc (Hons) Nursing (Adult)                                      |
| <b>The Open University</b>                        | BSc (Hons) Nursing (Adult)                                      |
| <b>The University of Hull</b>                     | BSc (Hons) Nursing (Adult)                                      |
| <b>The University of Hull</b>                     | BSc (Hons) Nursing (Adult)                                      |
| <b>University of Ulster</b>                       | BSc (Hons) Nursing (Adult)                                      |

| Approved education institution      | Course                                                     |
|-------------------------------------|------------------------------------------------------------|
| University Of East London           | BSc (Hons) Nursing (Adult)                                 |
| University Of Leeds                 | BSc (Hons) Nursing (Adult)                                 |
| University College Birmingham       | BSc (Hons) Nursing (Adult)                                 |
| University Of Southampton           | BSc (Hons) Nursing (Adult)                                 |
| Canterbury Christ Church University | BSc (Hons) Nursing (Adult)                                 |
| Birmingham City University          | BSc (Hons) Nursing (Adult)                                 |
| Anglia Ruskin University            | BSc (Hons) Nursing (Adult)                                 |
| Swansea University                  | BSc (Hons) Nursing (Adult)                                 |
| The Robert Gordon University        | BSc (Hons) Nursing (Adult)                                 |
| University of Bradford              | BSc (Hons) Nursing (Adult)                                 |
| The Open University                 | BSc (Hons) Nursing (Adult)                                 |
| The Open University                 | BSc (Hons) Nursing (Adult)                                 |
| University of Gloucestershire       | BSc (Hons) Nursing (Adult)                                 |
| University Of Hertfordshire         | BSc (Hons) Nursing (adult) - Nursing Degree Apprenticeship |
| The Open University                 | BSc (Hons) Nursing (Adult) - Nursing Degree Apprenticeship |
| Birmingham City University          | BSc (Hons) Nursing (Adult) - Nursing Degree Apprenticeship |
| University of Gloucestershire       | BSc (Hons) Nursing (Adult) (Apprenticeship)                |
| University of Gloucestershire       | BSc (Hons) Nursing (Adult) (Blended Learning)              |
| Edge Hill University                | BSc (Hons) Nursing (Adult) (fall back award)               |
| University Of Leeds                 | BSc (Hons) Nursing (Adult) (International)                 |
| Canterbury Christ Church University | BSc (Hons) Nursing (Adult) (NDA)                           |
| University of Bolton                | BSc (Hons) Nursing (Adult) (Part-time)                     |

| Approved education institution                    | Course                                                                            |
|---------------------------------------------------|-----------------------------------------------------------------------------------|
| <b>University of Bolton</b>                       | BSc (Hons) Nursing (Adult) (Registered Nursing Higher Apprenticeship) (Part-time) |
| <b>University of Bradford</b>                     | BSc (Hons) Nursing (Adult) [fall back award]                                      |
| <b>Buckinghamshire New University</b>             | BSc (Hons) Nursing (Adult) Apprenticeship                                         |
| <b>University of Salford</b>                      | BSc (Hons) Nursing (adult) Nurse Degree Apprentice                                |
| <b>University of Bolton</b>                       | BSc (Hons) Nursing (adult) nurse degree apprenticeship (NDA) route                |
| <b>Middlesex University</b>                       | BSc (Hons) Nursing (adult) seconded pathway                                       |
| <b>De Montfort University</b>                     | BSc (Hons) Nursing (Adult) with NMC Registration (Apprenticeship route)           |
| <b>University Of East London</b>                  | BSc (Hons) Nursing (Adult)-Registered Nurse (Degree) Apprenticeship Route         |
| <b>Queen Margaret University</b>                  | BSc (Hons) Nursing (fall back award)                                              |
| <b>University of Lincoln</b>                      | BSc (Hons) Nursing (Registered Nurse - Adult)                                     |
| <b>University of South Wales</b>                  | BSc (Hons) Nursing Adult                                                          |
| <b>Nottingham Trent University</b>                | BSc (Hons) Nursing Adult                                                          |
| <b>University Of Brighton</b>                     | BSc (Hons) Nursing Adult                                                          |
| <b>University of Worcester</b>                    | BSc (Hons) Nursing Adult                                                          |
| <b>Sheffield Hallam University</b>                | BSc (Hons) Nursing Adult (Part Time)                                              |
| <b>University Of The West Of England, Bristol</b> | BSc (Hons) Nursing apprenticeship - Adult                                         |
| <b>University Of Huddersfield</b>                 | BSc (Hons) Nursing Child (Blended Learning)                                       |
| <b>University of Sunderland</b>                   | BSc (Hons) nursing degree apprenticeship (adult)                                  |
| <b>Nottingham Trent University</b>                | BSc (Hons) Nursing Degree Apprenticeship Adult                                    |
| <b>Swansea University</b>                         | BSc (Hons) Nursing part-time (Adult)                                              |

| Approved education institution                         | Course                                                                     |
|--------------------------------------------------------|----------------------------------------------------------------------------|
| University Of Northumbria At Newcastle                 | BSc (Hons) nursing science (adult)                                         |
| University Of Northumbria At Newcastle                 | BSc (Hons) nursing science apprenticeship (adult)                          |
| Teesside University                                    | BSc (Hons) Nursing Studies (Adult) (Pre-registration) Apprenticeship route |
| Glasgow Caledonian University                          | BSc (Hons) Nursing Studies: Adult Nursing                                  |
| Liverpool John Moores University                       | BSc (Hons) Nursing with Registered Nurse Status (Adult)                    |
| Liverpool John Moores University                       | BSc (Hons) Nursing with Registered Nurse Status (Adult)                    |
| University of Cumbria                                  | BSc (Hons) Nursing/RN:Adult Nursing                                        |
| University of Cumbria                                  | BSc (Hons) Nursing/RN:Adult Nursing (Apprenticeship)                       |
| Keele University                                       | BSc (Hons) Nursing: Adult                                                  |
| Keele University                                       | BSc (Hons) Nursing: Adult (NDA)                                            |
| Kingston University & St George's University of London | BSc Adult Nursing                                                          |
| University Of Dundee                                   | BSc Adult Nursing                                                          |
| University of West of Scotland                         | BSc Adult Nursing                                                          |
| University Of Greenwich                                | BSc Adult Nursing (Degree Apprenticeship) (fall back award)                |
| University Of Greenwich                                | BSc Adult Nursing (fall back award)                                        |
| Middlesex University                                   | BSc Hons Nursing Adult                                                     |
| University of Highlands and Islands                    | BSc Nursing                                                                |
| City, University of London                             | BSc Nursing (Adult)                                                        |
| Oxford Brookes University                              | BSc Nursing (Adult)                                                        |
| The Robert Gordon University                           | BSc Nursing (Adult)                                                        |

| Approved education institution | Course                                                                  |
|--------------------------------|-------------------------------------------------------------------------|
| The Robert Gordon University   | BSc Nursing (Adult)                                                     |
| University Of Stirling         | BSc Nursing (Adult)                                                     |
| The Robert Gordon University   | BSc Nursing (Adult) (fall back award)                                   |
| Glasgow Caledonian University  | BSc Nursing Studies: Adult Nursing                                      |
| King's College London          | BSc Nursing with Registration as an Adult Nurse                         |
| University of Ulster           | BSc(Hons) Nursing (Adult)                                               |
| University of Lincoln          | Degree Science Nursing (Registered Nurse - Adult: Apprenticeship Route) |
| University of Salford          | MA Nursing (adult)                                                      |
| University Of Wolverhampton    | Master of Adult Nursing                                                 |
| University Of Wolverhampton    | Master of Nursing (Adult Nursing)                                       |
| University Of Birmingham       | Master of Nursing (Adult)                                               |
| University Of Wolverhampton    | Master of Nursing (MNurs) Adult Nursing                                 |
| University Of Birmingham       | Master of Science in Nursing (Adult)                                    |
| University of Derby            | Master of Science in Nursing (Adult)                                    |
| University of Derby            | Master of Science in Nursing (adult) (apprenticeship)                   |
| University Of Manchester       | Masters in Nursing (Adult)                                              |
| University Of Edinburgh        | Masters in Nursing with pre-registration (adult)                        |
| University Of Sheffield        | MMedSci Nursing (Adult)                                                 |
| Queen Margaret University      | MN Nursing                                                              |
| Edge Hill University           | MNSW Adult Nursing and Social Work                                      |
| University of Sunderland       | MNurse (Adult)                                                          |
| University Of York             | MNursing (Adult)                                                        |
| University Of Hertfordshire    | MSc Hons Nursing (Adult)                                                |



| Approved education institution                         | Course                                                                              |
|--------------------------------------------------------|-------------------------------------------------------------------------------------|
| University Of Northumbria At Newcastle                 | MSc (Hons) nursing science (adult)                                                  |
| University Of Dundee                                   | MSc Adult Nursing                                                                   |
| University Of Greenwich                                | MSc Adult Nursing                                                                   |
| University of Chester                                  | MSc Adult Nursing                                                                   |
| University of Chester                                  | MSc Adult Nursing                                                                   |
| University of Chester                                  | MSc Adult Nursing                                                                   |
| University of Bedfordshire                             | MSc Adult Nursing                                                                   |
| London South Bank University                           | MSc adult nursing                                                                   |
| University of West of Scotland                         | MSc Adult Nursing                                                                   |
| University of Chester                                  | MSc Adult Nursing                                                                   |
| Bournemouth University                                 | MSc Adult Nursing                                                                   |
| Kingston University & St George's University of London | MSc Adult Nursing                                                                   |
| Coventry University                                    | MSc Adult Nursing                                                                   |
| University of Bedfordshire                             | MSc Adult Nursing (apprenticeship)                                                  |
| Birmingham City University                             | MSc Adult Nursing (pre-registration)                                                |
| Manchester Metropolitan University                     | MSc Adult Nursing (Pre-registration)                                                |
| University of Chester                                  | MSc Adult Nursing Apprenticeship                                                    |
| Coventry University                                    | MSc Adult Nursing Blended Learning (pre-registration)                               |
| Coventry University                                    | MSc Adult Nursing Blended Learning (pre-registration) Nursing Degree Apprenticeship |
| University Of Southampton                              | MSc Nursing (Adult)                                                                 |
| Canterbury Christ Church University                    | MSc Nursing (Adult)                                                                 |
| City, University of London                             | MSc Nursing (Adult)                                                                 |

| Approved education institution   | Course                                                                |
|----------------------------------|-----------------------------------------------------------------------|
| University Of Hertfordshire      | MSc Nursing (adult) - Nursing Degree Apprenticeship (part time route) |
| University of Nottingham         | MSc nursing (graduate entry) (adult)                                  |
| University of Lincoln            | MSc Nursing (Pre-Registration – Adult)                                |
| Edge Hill University             | MSc Nursing (Pre-registration Adult)                                  |
| University Of Huddersfield       | MSc Nursing (pre-registration) - Adult                                |
| Swansea University               | MSc Nursing Pre-registration (Adult)                                  |
| Teesside University              | MSc Nursing Studies (Adult Apprenticeship)                            |
| Glasgow Caledonian University    | MSc Nursing Studies: Adult Nursing                                    |
| University of Central Lancashire | MSc nursing with registered nurse (adult)                             |
| Liverpool John Moores University | MSc Nursing with Registered Nurse Status (Adult)                      |
| Liverpool John Moores University | MSc Nursing with Registered Nurse Status (Adult)                      |
| King's College London            | MSc Nursing with Registration as an Adult Nurse                       |
| University Of Plymouth           | MSc Pre-registration Nursing (Adult Health)                           |
| University Of Huddersfield       | MSc Pre-registration Nursing apprenticeship-Adult                     |
| University Of Huddersfield       | MSc Pre-registration Nursing Apprenticeship Child (Blended Learning)  |
| University Of Huddersfield       | MSc Pre-registration Nursing Child (Blended Learning)                 |
| University of Cumbria            | MSc Pre-Registration Nursing/Registered Nurse: Adult Nursing          |
| Edge Hill University             | MSci Nurse Paramedic (Adult)                                          |
| University Of Exeter             | MSci nursing (adult)                                                  |
| University of Leicester          | MSci Nursing with Leadership Adult Nursing                            |

| Approved education institution           | Course                                                              |
|------------------------------------------|---------------------------------------------------------------------|
| <b>Middlesex University</b>              | Nurse Degree Apprenticeship Adult (4 year direct entry route)       |
| <b>Middlesex University</b>              | Nurse Degree Apprenticeship Adult (4 year part-time employed route) |
| <b>University of West London</b>         | Nurse Degree Apprenticeship BNursing (Hons) Adult                   |
| <b>University of Central Lancashire</b>  | Nursing Degree Apprenticeship route – Adult                         |
| <b>Teesside University</b>               | Nursing Studies (Adult) (Pre-registration) BSc (Hons)               |
| <b>Teesside University</b>               | Nursing Studies (Adult) (Pre-Registration) MSc                      |
| <b>University of West of Scotland</b>    | PG Dip Adult Nursing                                                |
| <b>London South Bank University</b>      | PG Dip adult nursing                                                |
| <b>University Of Greenwich</b>           | PG Dip Adult Nursing (fall back award)                              |
| <b>University of South Wales</b>         | PG Dip Nursing Adult                                                |
| <b>University of West London</b>         | PG Diploma Nursing Adult                                            |
| <b>Edge Hill University</b>              | PgDip Nursing (second registration Adult)                           |
| <b>University Of Southampton</b>         | Postgraduate Diploma Nursing (Adult)                                |
| <b>The Queen's University Of Belfast</b> | Pre-registration nursing - Adult                                    |
| <b>Sheffield Hallam University</b>       | Pre-registration nursing - Adult                                    |
| <b>The Queen's University Of Belfast</b> | Pre-registration nursing - Adult (Graduate Entry)                   |
| <b>Staffordshire University</b>          | Registered Nurse (Adult)                                            |
| <b>University Of Brighton</b>            | Registered Nurse Degree Apprenticeship (Adult)                      |

## UK M.S.C Approved Medicine and Surgery Programmes

| Institution Name                                                |
|-----------------------------------------------------------------|
| University of Aberdeen School of Medicine and Dentistry         |
| Anglia Ruskin University School of Medicine                     |
| Aston University Medical School                                 |
| Barts and The London School of Medicine and Dentistry           |
| University of Birmingham College of Medical and Dental Sciences |
| Brighton and Sussex Medical School                              |
| University of Bristol Medical School                            |
| University of Buckingham Medical School                         |
| University of Cambridge School of Clinical Medicine             |
| Cardiff University School of Medicine                           |
| University of Dundee School of Medicine                         |
| Edge Hill University Medical School                             |
| The University of Edinburgh Medical School                      |
| University of Exeter Medical School                             |
| University of Glasgow School of Medicine                        |
| Hull York Medical School                                        |
| Imperial College London Faculty of Medicine                     |
| Keele University School of Medicine                             |
| Kent and Medway Medical School                                  |
| King's College London GKT School of Medical Education           |
| Lancaster University Medical School                             |
| University of Leeds School of Medicine                          |
| University of Leicester Medical School                          |
| University of Liverpool School of Medicine                      |
| University of Manchester Medical School                         |
| Newcastle University School of Medical Education                |
| Norwich Medical School                                          |
| University of Nottingham School of Medicine                     |

|                                                                 |
|-----------------------------------------------------------------|
| University of Nottingham - Lincoln Medical School               |
| University of Oxford Medical Sciences Division                  |
| Plymouth University Peninsula Schools of Medicine and Dentistry |
| Queen's University Belfast School of Medicine                   |
| University of Sheffield Medical School                          |
| University of Southampton School of Medicine                    |
| University of St Andrews School of Medicine                     |
| St George's, University of London                               |
| University of Sunderland School of Medicine                     |
| Swansea University Medical School                               |
| University of Central Lancashire School of Medicine             |
| University College London Medical School                        |
| University of Warwick Medical School                            |
